# Supplementary material for: Dictamnine, a Novel c-Met Inhibitor, Suppresses the Proliferation of Lung Cancer Cells by Downregulating the PI3K/Ak/mTOR and MAPK Signaling Pathways
Source: Research Square preprint supplement (doi:10.21203/rs.3.rs-94028/v1), 2020-10-21
Supplement: Supplementary file 1 [file 48836afb41ed948f7287bc56.docx]

**Additional file 1:**

Supplementary tables. Antibodies used in Western blotting (WB) or immunohistochemistry (IHC) and sequences of primer used in qRT-PCR

**Table S1.** Information of antibodies used in WB or IHC

| **Antibody (product code)** | **Brand** | **Dilution ratio (WB)** |  |
| --- | --- | --- | --- |
| p-c-Met (ab5662) | Abcam, UK | 1:1000 |
| c-Met (ab39075) | Abcam, UK | 1:1500 |
| E-cadherin (ab40772) | Abcam, UK | 1:1000 |
| N-cadherin (ab18203) | Abcam, UK | 1:1000 |
| p-AKT (5473) | CST, USA | 1:1000 |
| AKT (11E7) | CST, USA | 1:2000 |
| p-PI3K (4228) | CST, USA | 1:2000 |
| PI3K (4249) | CST, USA | 1:2000 |
| p-STAT3 (4113) | CST, USA | 1:200 |
| STAT3 (12640) | CST, USA | 1:2000 |
| B-Raf (L12G7) | CST, USA | 1:2000 |
| p-B-Raf (2696S) | CST, USA | 1:2000 |
| ERK (4695S) | CST, USA | 1:3000 |
| p-ERK (9101S) | CST, USA | 1:3000 |
| Cleaved-caspase-7 (D198) | CST, USA | 1:2000 |
| IL-1β (3A6) | CST, USA | 1:1000 |
| p-m-TOR (sc-293133) | CST, USA | 1:2000 |
| m-TOR (sc-517464) | CST, USA | 1:3000 |
| p-GSK-3β (sc-373800) | CST, USA | 1:2000 |
| GSK-3β (sc-377213) | Santa Cruz, USA | 1:3000 |
| β-catenin (sc-7963) | Santa Cruz, USA | 1:2000 |
| c-Myc (sc-40) | Santa Cruz, USA | 1:2000 |
| cyclin D1 (sc-166210) | Santa Cruz, USA | 1:1000 |

**Table S1.** Information of antibodies used in WB or IHC

(Continued from previous page)

| **Antibody (product code)** | **Brand** | **Dilution ratio (WB)** |  |
| --- | --- | --- | --- |
| p-FAK (sc-374668) | Santa Cruz, USA | 1:2000 |
| p-FAK (sc-81493) | Santa Cruz, USA | 1:2000 |
| FAK (sc-271195) | Santa Cruz, USA | 1:1000 |
| MMP-2 (sc-13594) | Santa Cruz, USA | 1:2000 |
| MMP-9 (sc-21733) | Santa Cruz, USA | 1:2000 |
| β-Actin (sc-47778) | Santa Cruz, USA | 1:1000 |
| Vimentin (V6630) | Sigma, USA | 1:2000 |
| GAPDH (60004) | Proteintech, USA | 1:3000 |
| Tubulin (05-661) | Millipore, UK | 1:3000 |
| CDK1 (AF0111) | Beyotime, China | 1:2000 |
| Ki67 (AB9260) | Merck-Millipore, Germany | 1:200 |

**Table S2.** Sequences of primer used in qPCR

| **Gene symbol** | **Sense (5’-3’)** | **Antisense (5’-3’)** |
| --- | --- | --- |
| Bax | GCAAACTGGTGCTCAAGGCCC | TCGCTTCAGTGACTCGGCCA |
| Bid | ACTGTTGAGTGGCTGAAT | AGTGGCGACAGAATCCGC |
| Bcl-2 | AGGCTGGGATGCCTTTGTGGAA | ACCAGGGCCAAACTGAGCAGA |
| E-cadherin | GCTGGACCGAGAGAGTTTCC | CGACGTTAGCCTCGTTCTCA |
| N-cadherin | AGGCTTCTGGTGAAATCGCA | TGCAGTTGCTAAACTTCACATTG |
| Vimentin | TCCGCACATTCGAGCAAAGA | TGATTCAAGTCTCAGCGGGC |
| GAPDH | AAGGTCGGAGTCAACGGATTTGG | TTCTCAGCCTTGACGGTGCC |
